RESEARCH ARTICLE

# Modeling the interactions of sense and antisense *Period* transcripts in the mammalian circadian clock network

Dorjsuren Battogtokh<sup>1\*</sup>, Shihoko Kojima<sup>1,2,3</sup>, John J. Tyson<sup>1,2,3\*</sup>

**1** Department of Biological Sciences, Virginia Polytechnic Institute and State University, Blacksburg, Virginia, United States of America, **2** Biocomplexity Institute, Virginia Polytechnic Institute and State University, Blacksburg, Virginia, United States of America, **3** Division of Systems Biology, Academy of Integrated Science, Virginia Polytechnic Institute and State University, Blacksburg, United States of America

\* [dbattogt@vt.edu](mailto:dbattogt@vt.edu) (DB); [tyson@vt.edu](mailto:tyson@vt.edu) (JJT)

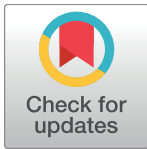

**OPEN ACCESS**

**Citation:** Battogtokh D, Kojima S, Tyson JJ (2018) Modeling the interactions of sense and antisense *Period* transcripts in the mammalian circadian clock network. PLoS Comput Biol 14(2): e1005957. <https://doi.org/10.1371/journal.pcbi.1005957>

**Editor:** Joerg Stelling, ETH Zurich, SWITZERLAND

**Received:** June 5, 2017

**Accepted:** January 4, 2018

**Published:** February 15, 2018

**Copyright:** © 2018 Battogtokh et al. This is an open access article distributed under the terms of the [Creative Commons Attribution License](https://creativecommons.org/licenses/by/4.0/), which permits unrestricted use, distribution, and reproduction in any medium, provided the original author and source are credited.

**Data Availability Statement:** All relevant software are within the paper and its Supporting Information files.

**Funding:** This work was supported by grant #150056 from the Sumitomo Foundation (<http://www.sumitomo.or.jp/e/>) and grant #21267 from the National Alliance for Research on Schizophrenia and Depression (<https://www.narad.org/>) to SK. The funders had no role in study design, data collection and analysis, decision to publish, or preparation of the manuscript.

## Abstract

In recent years, it has become increasingly apparent that antisense transcription plays an important role in the regulation of gene expression. The circadian clock is no exception: an antisense transcript of the mammalian core-clock gene *PERIOD2* (*PER2*), which we shall refer to as *Per2AS* RNA, oscillates with a circadian period and a nearly 12 h phase shift from the peak expression of *Per2* mRNA. In this paper, we ask whether *Per2AS* plays a regulatory role in the mammalian circadian clock by studying *in silico* the potential effects of interactions between *Per2* and *Per2AS* RNAs on circadian rhythms. Based on the antiphase expression pattern, we consider two hypotheses about how *Per2* and *Per2AS* mutually interfere with each other's expression. In our *pre-transcriptional* model, the transcription of *Per2AS* RNA from the non-coding strand represses the transcription of *Per2* mRNA from the coding strand and *vice versa*. In our *post-transcriptional* model, *Per2* and *Per2AS* transcripts form a double-stranded RNA duplex, which is rapidly degraded. To study these two possible mechanisms, we have added terms describing our alternative hypotheses to a published mathematical model of the molecular regulatory network of the mammalian circadian clock. Our *pre-transcriptional* model predicts that transcriptional interference between *Per2* and *Per2AS* can generate alternative modes of circadian oscillations, which we characterize in terms of the amplitude and phase of oscillation of core clock genes. In our *post-transcriptional* model, *Per2/Per2AS* duplex formation dampens the circadian rhythm. In a model that combines *pre-* and *post-transcriptional* controls, the period, amplitude and phase of circadian proteins exhibit non-monotonic dependencies on the rate of expression of *Per2AS*. All three models provide potential explanations of the observed antiphase, circadian oscillations of *Per2* and *Per2AS* RNAs. They make discordant predictions that can be tested experimentally in order to distinguish among these alternative hypotheses.

**Competing interests:** The authors have declared that no competing interests exist.

## Author summary

A better understanding of the molecular mechanisms underlying circadian rhythms will undoubtedly improve the treatment of human health problems related to circadian dysrhythmias. However, the inventory of genes and genetic interactions in the circadian clock is still incomplete. Important players may yet be unknown or under-appreciated. For example, in mouse liver, the core clock gene *PER2* is transcribed into both a *Per2* mRNA molecule (a ‘sense’ transcript) and an antisense RNA transcript (*Per2AS*). Because it is important to know how interactions between *Per2* and *Per2AS* may affect circadian gene expression, we have carried out a mathematical modeling study of two possible mechanisms for these interactions. In the *pre-transcriptional* model, *Per2* mRNA interferes with the transcription of *Per2AS* RNA and *vice versa*. In the *post-transcriptional* model, *Per2* and *Per2AS* molecules form double-stranded RNA duplexes, which are rapidly degraded by RNases. We find that the *pre-transcriptional* model gives a more robust account of the circadian, antiphase oscillations of *Per2* and *Per2AS* transcripts in mouse liver. The model makes an unexpected prediction that co-overexpression of the *ROR* gene and *Per2AS* sequences can generate a new mode of circadian oscillations not seen in contemporary models of circadian rhythms and not yet looked for experimentally.

## Introduction

Messenger RNAs, which encode proteins, are transcribed in the 5′-to-3′ direction from one strand (the sense strand) of a structural gene, under the control of an upstream promoter region. For some genes, an ‘antisense’ RNA molecule is transcribed from the opposite strand, driven by an alternative promoter which often lies in an intron of the sense transcript [1, 2]. Antisense transcripts are rarely translated into proteins; their primary effects are in regulating the expression of a ‘target’ transcript [3–6]. Because of their complementary sequences, the natural target of an antisense transcript is typically its sense counterpart and *vice versa*. Interactions between these transcripts are possible not only post-transcriptionally [7–9] but also during the transcription process [10–12]. Difficulties in simultaneously transcribing RNAs from both strands of the same genomic locus, termed transcriptional interference, can mutually repress the expression of both sense and antisense transcripts [13].

Recently Koike *et al.* [14] reported that an antisense transcript of *PER2*, a key core-clock gene, displays oscillatory dynamics. The maximum level of the antisense transcript, *Per2AS*, was about 5% of *Per2*’s maximum level, and the two transcripts were expressed in antiphase, *i. e.*, the peak of *Per2AS* expression was displaced about 12 h from the peak of *Per2* mRNA. From previous studies of the regulation of gene expression by antisense transcripts in other organisms, it is known that antisense expression can effectively control expression of sense mRNAs; for example, by a tunable, bistable switch [13, 15, 16]. To date the potential regulatory roles of antisense transcripts in a system with oscillatory dynamics have not been studied systematically. Therefore, a natural question is to what extent the rhythms in the mammalian circadian clock can be affected by *Per2AS* expression.

In this work, we study, by numerical simulation and bifurcation analysis [17], the effects of sense-antisense interactions in a mathematical model of the mammalian circadian network proposed by Relogio *et al.* [18]. Relogio’s model is based on two, synergistic feedback loops: the classic, negative feedback loop involving CLOCK/BMAL1 and PER/CRYPTOCHROME (CRY), and the alternative, mixed feedback loop involving BMAL1, REV-ERB (REV) and ROR. We supplement Relogio’s model with an additional, double-negative feedback loop

between *Per2* and *Per2AS* RNA species. (Simulations of the original Relgio model agree with many previously reported experimental observations [2, 19–21], and we are careful to retain these successful features of the published model.) By incorporating new terms and variables into Relgio’s model, we study, *in silico*, the effects of two different hypotheses concerning *Per2-Per2AS* interactions. In our first model, called the *pre-transcriptional* model, we assume that *Per2* and *Per2AS* mutually repress each other’s production during the process of transcription. This hypothesis is motivated by recent observations of circadian rhythmicity in *Neurospora*, where it was shown that sense and antisense transcripts of the *FREQUENCY (FRQ)* gene control the circadian rhythm by transcriptional interference [22]. Our second model, the *post-transcriptional* model, is based on the assumption that fully transcribed *Per2* and *Per2AS* form double-stranded duplex RNAs, which are degraded by RNases, similar to siRNA- or miRNA-mediated RNA degradation mechanisms [23]. After considering these two models separately, we study a third model that combines pre- and post-transcriptional interactions.

In our simulations of these three modified Relgio-models, the dynamics of *Per2* and *Per2AS* are consistent with the fundamental observation of Koike *et al.* that the RNAs oscillate with ~24 h period and in antiphase to each other. Our *pre-transcriptional* model shows that the interference of *Per2AS* on the transcription of *Per2* and *vice versa* can generate new modes of oscillations (both circadian and non-circadian) in the network, because of the way the double-negative feedback loop between *Per2* and *Per2AS* interacts with the synergistic feedback loops in the original Relgio model. In contrast, the *post-transcriptional* model shows that circadian rhythms can be destroyed by *Per2AS* overexpression, because duplex formation rapidly suppresses the expression of *Per2* mRNA. A characteristic feature of the *pre-* and *post-transcriptional* models is that the period of the oscillation is sensitive to the interactions of *Per2* and *Per2AS*. The combined *pre/post-transcriptional* model shows that if *Per2AS* is involved in two different levels of *Per2* regulation, then the period of the oscillation, as a function of *Per2AS* overexpression, can be restricted to a narrow interval.

## Models and methods

### Incorporating sense-antisense transcripts into Relgio’s model of the mammalian circadian clock

Fig 1A presents a schematic diagram of the circadian clock network in mammalian cells, as originally proposed by Relgio *et al.* [18]. CLOCK/BMAL1 up-regulates the expression of the core clock genes, *PER*, *CRY*, *REV*, and *ROR*. Newly synthesized PER and CRY proteins form multimeric complexes in the cytoplasm, and these complexes enter the nucleus, in both phosphorylated and unphosphorylated forms of PER. The PER/CRY complex inhibits CLOCK/BMAL1-activated transcription, by creating a delayed negative-feedback loop in the transcription-translation process. The PER/CRY complex is degraded during the night, releasing its inhibitory effect on CLOCK/BMAL1, to allow a fresh restart of the transcription processes [18].

ROR and REV proteins in the nucleus bind to the promoter region of the *BMAL1* gene, thereby modulating the expression of *Bmal1* mRNA. ROR is an activator and REV an inhibitor of *BMAL1* expression [24]. Previously, *ROR* and *REV* genes were often considered as auxiliary elements in the network, whose primary roles were to fine-tune the expression of *BMAL1* and add robustness to the rhythmic dynamics [25, 26]. However, in the model of Relgio *et al.*, the effects of REV and ROR on *BMAL1* expression form independent loops that can generate sustained oscillations autonomously, even if the *PER* and *CRY* genes are expressed constitutively. Some experimental evidence suggests that the feedback loops through REV and ROR are critical for maintaining circadian oscillations; for instance, when REV or ROR is overexpressed or

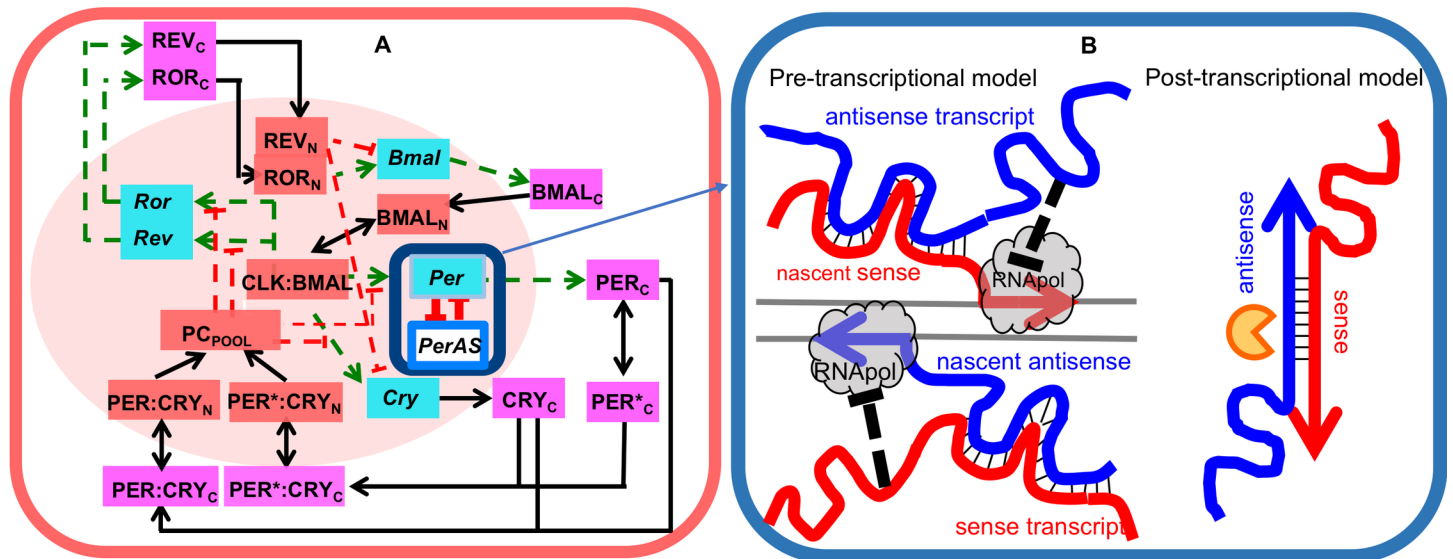

**Fig 1. (A)** Wiring diagram of the circadian clock network in mammalian cells, based on Relogio *et al.* [18]. We have incorporated double-negative interactions between the sense (*Per*) and antisense (*PerAS*) transcripts highlighted by the navy blue outline. Blue boxes mark core-clock genes. Nuclear and cytoplasmic proteins (and protein complexes) are indicated by pink and orange boxes, respectively. The asterisk indicates phosphorylation of PER protein. Black arrows indicate chemical reactions (e.g., phosphorylation and dephosphorylation) or physical translocations (e.g., cytoplasm to nucleus). Dashed lines indicate regulatory effects: activating (green) or inhibiting (red). **(B)** Two hypotheses for sense-antisense RNA interactions. *Pre-transcriptional hypothesis*: *Per2* sense RNA interferes with the transcription of nascent *Per2AS* antisense RNA and *vice versa*. *Post-transcriptional hypothesis*: sense and antisense transcripts form RNA-duplex stretches, where their sequences are complementary. These double-stranded RNA molecules are then rapidly degraded by RNases (the yellow ‘Pac Man’ icon).

<https://doi.org/10.1371/journal.pcbi.1005957.g001>

both REV-ERB $\alpha$  and REV-ERB $\beta$  are knocked-out, circadian rhythmicity can be lost [18, 19, 27].

From the schematic diagram in Fig 1A, Relogio *et al.* derived a system of ordinary differential equations (ODEs) that represent the temporal dynamics of these circadian genes and proteins. Other groups have presented alternative mathematical models of mammalian circadian rhythms [28–31], but the Relogio model is most fitting for our purposes in this paper. In contrast to other models that focus on the negative feedback loop, in which PER/CRY inhibits CLOCK/BMAL1, the Relogio model considers the mammalian circadian clock as a network of synergistic and interlocked feedback loops whereby, in addition to PER/CRY inhibition of CLOCK/BMAL1, REV and ROR control the expression of *BMAL1*, as inhibitor and activator, respectively (see Fig 1A).

The Relogio model [18] consists of 19 ODEs with 76 parameters (rate constants for the constituent biochemical reactions in the network). With an appropriate choice of these parameter values, the model generates simulations in agreement with many well-established experimental properties of circadian rhythms in mammalian cells. For this reason, we have chosen the Relogio model for studying the effects of *Per2* sense-antisense interactions. Our strategy is to incorporate into the model new variables and reaction rates that represent potential interactions of sense-antisense RNAs (*Per2* and *Per2AS*), while keeping the modified model as close as possible to the original Relogio ODEs, and keeping the parameter values as close as possible to the ‘wild-type’ (WT) values in reference [18].

### Hypotheses for sense-antisense transcript interactions

Previously, it was shown by Xue *et al.* in *Neurospora crassa* [22] that coupled transcription of the key circadian gene *FRQ* and its antisense partner *QRF* directly modulates the circadian

rhythm, as a consequence of mutually inhibitory interactions between *frq* and *qrfr* RNAs. Following this lead, we hypothesize that the interactions of *Per2* and *Per2AS* may also modulate circadian rhythmicity in mammalian cells, by forming a double-negative feedback loop. In Fig 1A, we indicate the mutually inhibitory interactions between *Per* and *PerAS* RNAs by the red lines in a small blue box.

At present, there are no experimental data about the exact molecular mechanisms by which *Per2* and *Per2AS* interact in the circadian network. Therefore, our strategy is to propose reasonable hypotheses for the interaction and to study the consequences of these interactions *in silico*. We propose two simple, feasible mechanisms for sense-antisense interactions, which function either before or after the transcriptional process is complete (Fig 1B). Our aim is not to prove that one or other of these hypotheses is correct, but rather to study the potential effects of sense-antisense interactions on circadian rhythms of the core-clock network, in terms of modulating the period, amplitude, and phases of oscillations.

**Pre-transcriptional model of sense-antisense interactions (Fig 1B, left panel).** First of all, we added a new ODE to Religio’s model to describe the synthesis and degradation of *Per2AS*:

$$\frac{dPer2AS}{dt} = \frac{\lambda K_S}{K_S + Per2} - d_{AS} \cdot Per2AS, \tag{1A}$$

Eq (1A) includes a simple, phenomenological representation of interference by *Per2* on *Per2AS* transcription:  $\lambda$  is the maximum rate of synthesis of *Per2AS* RNA (when antisense transcription is not being interfered with by *Per2* mRNA), and  $K_S$  is the concentration of *Per2* mRNA that causes a 50% decrease in the rate of synthesis of *Per2AS*. Degradation of *Per2AS* is described by the law of mass action, with rate constant  $d_{AS}$ .

In a similar fashion, we modified the ordinary differential equation for *Per2* mRNA dynamics in the original Religio model (Eq (11) of their Supplemental S1 Text) by multiplying their function,  $a \cdot V_{1max} \cdot R(\dots)$ , for *Per2* transcription by a factor,  $\mu K_{AS} / (K_{AS} + Per2AS)$ , to represent interference by *Per2AS*:

$$\frac{dPer2}{dt} = a \cdot V_{1max} \cdot R(\dots) \cdot \frac{\mu K_{AS}}{K_{AS} + Per2AS} - d_{Per2} \cdot Per2. \tag{1B}$$

In this equation,  $R(\dots)$  is a Hill-type function,  $0 \leq R(k, X) \leq 1$ , used by Religio *et al.* to represent the regulation of *PER2* gene expression by CLOCK/BMAL1 and nuclear PER/CRY (both phosphorylated and unphosphorylated forms):

$$R(\dots) = \frac{\left(\frac{1}{a}\right) + \left(\frac{[CLK/BMAL]}{K_{t1}}\right)^b}{1 + \left(\frac{[CLK/BMAL]}{K_{t1}}\right)^b \left\{ 1 + \left(\frac{[PER_N/CRY_N]}{K_{t1}}\right)^c \right\}} \tag{1C}$$

In Eq (1B) the product  $\mu \cdot a \cdot V_{1max}$  represents the maximum rate of transcription of *Per2* mRNA. (In Religio’s model, ‘y1’ is their name of *Per2* mRNA,  $d_{y1}$  is their name of the rate constant for *Per2* degradation. Their WT values for these parameters are  $a = 12$ ,  $V_{1max} = 1$ , and  $d_{y1} = 0.3$ .) For  $\mu = 1$  and  $K_{AS} \gg Per2AS$ , Eq (1B) reduces to the differential equation for *Per2* in the original Religio model.

We retain the redundancy of parameters ( $\mu$ ,  $a$  and  $V_{1max}$ ) that determine the maximum rate of transcription of *Per2* mRNA in order to maintain a certain consistency with the nomenclature and parameter values in the original Religio model. Religio *et al.* used  $a$  to modulate the maximum transcription rate and  $V_{1max}$  to represent the dosage of the *PER2* gene (hence,  $V_{1max} = 1$  in the WT parameter set). We retain that distinction, and we introduce a third

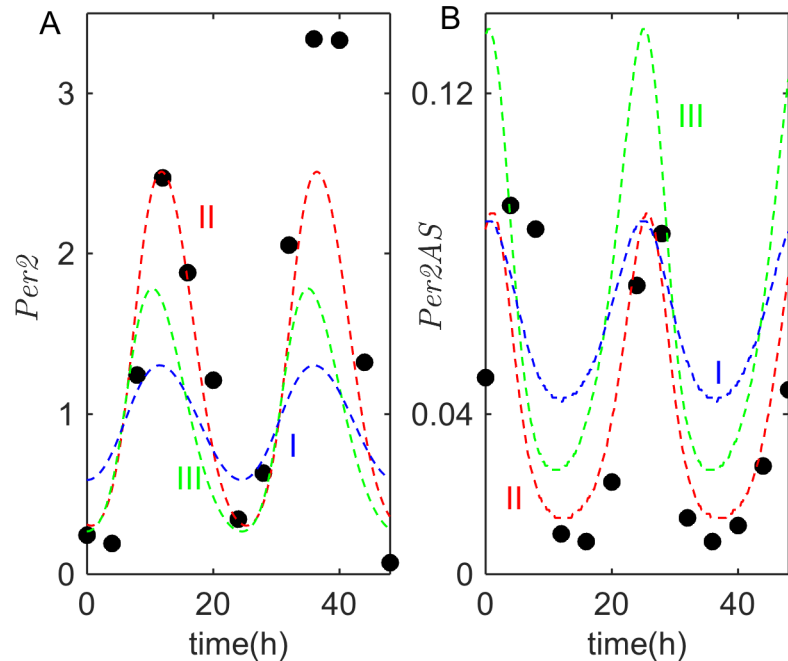

**Fig 2. Simulations of *Per2* and *Per2AS* oscillations in the *pre-transcriptional* model.** Solid circles mark time-courses of *Per2*-sense (left) and -antisense (right) transcripts, as observed by Koike *et al.* in mouse liver [14]. Blue, green, and red lines show model simulations for three alternative sets of parameter values provided in Suppl. S1 Table. Among these parameter sets, Set III simulations are closest to simulations of the model with Relgio's WT parameter values (see Suppl. S2 Fig).

<https://doi.org/10.1371/journal.pcbi.1005957.g002>

parameter,  $\mu$ , to represent the strength of the interference of *Per2AS* on the transcription of *Per2* mRNA. Nonetheless, one should remember that it is always the product  $\mu \cdot a \cdot V_{1max}$  that determines the maximum rate of transcription of *Per2* mRNA in the differential equations.

We could consider Eqs (1A) and (1B) as simple, phenomenological representations of the mutual interference between *Per2* and *Per2AS* at the level of gene transcription, without being specific about the precise mechanism of these interactions. However, as we show in Suppl. S1 Text, we can derive Eqs (1A) and (1B) from a detailed molecular model (Suppl. S1 Fig) of transcriptional interference, as suggested by the left panel of Fig 1B. In either interpretation, Eqs (1A) and (1B) are suitable mathematical representations of the effects of transcriptional interference on the dynamics of the circadian rhythm model in mammalian cells.

We note that our *pre-transcriptional* model differs from a model proposed previously by Xue *et al.* [22] for interactions between the sense (*FRQ*) and anti-sense (*QRF*) transcripts of a circadian rhythm in *Neurospora*. Although these authors attribute the interactions to “premature termination of transcription”, they model the interactions (in their Extended Data Fig 4C) as a loss of *FRQ* RNA at a rate proportional to *QRF* concentration and *vice versa*. In our formulation, the rate of synthesis of *FRQ* RNA decreases with increasing *QRF* concentration (and *vice versa*) but never becomes negative. Our formulation of the rate equations is more realistic biochemically, and it produces results that are consistent with the reported dynamics of *frq* and *qrf* genes in the previous work.

**Post-transcriptional model of sense-antisense interactions (Fig 1B, right panel).** In this version of the model, we assume that, due to their complementary sequences, sense-antisense transcripts form duplexes, *i.e.*, double-stranded RNAs. Because duplex formation reduces the levels of both transcripts, it can be considered as a mutually inhibitory interaction. Letting

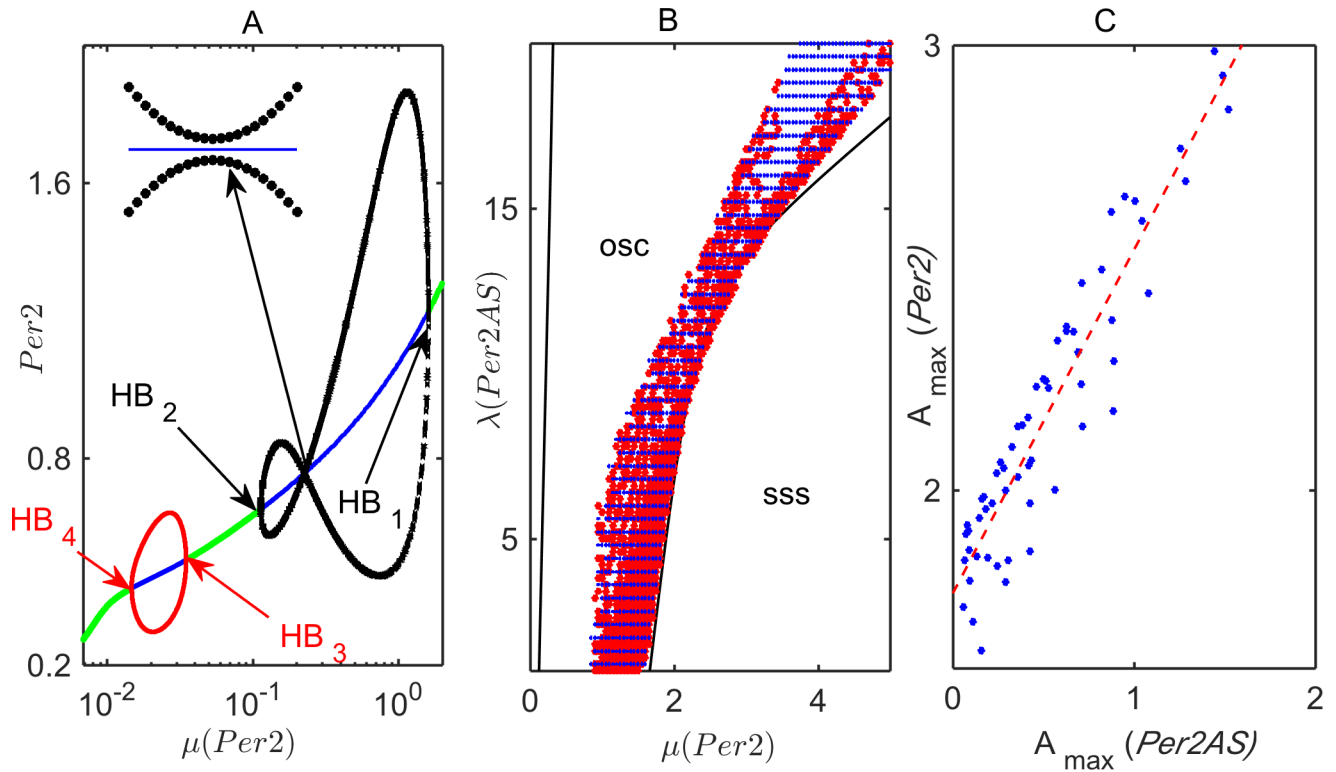

**Fig 3. Bifurcation analysis of the pre-transcriptional model.** (A) One-parameter bifurcation diagram. The transcription rate of the *Per2* mRNA is varied, using  $\mu$  as the primary bifurcation parameter, while all other parameters are fixed at Relgio’s WT values (Suppl. S1 Table); in particular,  $\lambda = 1$ . Green lines indicate stable steady states; blue lines, unstable steady states. In this diagram there are four Hopf bifurcation points,  $HB_i$ ,  $i = 1, \dots, 4$ . The black and red curves indicate the amplitude (maximum and minimum) of the oscillations that bifurcate from the HB points. (B) Two-parameter bifurcation diagram on the  $(\mu, \lambda)$  parameter plane. Solid black lines are continuations of the Hopf bifurcation points  $HB_1$  and  $HB_2$  in panel A. Blue symbols represent parameter combinations that give a circadian rhythm,  $23.2 \text{ h} < T < 23.7 \text{ h}$ . Red symbols mark the region where, in addition to this restriction on oscillation period, *Per2* and *Per2AS* oscillate nearly out of phase, i.e.,  $11 \text{ h} < |\phi_{Per2} - \phi_{Per2AS}| < 13 \text{ h}$ . Other parameters are fixed at the WT ‘Relgio’ values. (C) The relationship between the maximum amplitudes ( $A_{max}$ ) of *Per2* and *Per2AS* oscillations for a sample of parameter combinations shown in panel B by the red symbols. The dashed red line is a linear regression to the sample points.

<https://doi.org/10.1371/journal.pcbi.1005957.g003>

$k_{assn}$  be the rate constant for duplex formation (association) and  $k_{diss}$  the rate constant for the reverse reaction (dissociation), we write our model for *post-transcriptional* interactions as:

$$\begin{aligned}
 \frac{dPer2AS}{dt} &= \lambda_0 - k_{assn} \cdot Per2AS \cdot Per2 + k_{diss} \cdot Dplx - d_{AS} \cdot Per2AS, \\
 \frac{dDplx}{dt} &= k_{assn} \cdot Per2AS \cdot Per2 - k_{diss} \cdot Dplx - d_{dup} \cdot Dplx, \\
 \frac{dPer2}{dt} &= a \cdot V_{1max} \cdot R(\dots) - k_{assn} \cdot Per2AS \cdot Per2 + k_{diss} \cdot Dplx - d_{Per2} \cdot Per2.
 \end{aligned}
 \tag{2}$$

In this version of the model,  $\lambda_0$  is the (constant) synthesis rate of *Per2AS* and  $d_{dup}$  is the rate constant for degradation of the duplex RNA. In this formulation of the model, degradation of the duplex RNA provides an alternative pathway for loss of *Per2* and *Per2AS* RNAs, without introducing the possibility of negative RNA concentrations, as in the differential equations proposed by Xue *et al.* [22].

**Combined pre/post model for irreversible duplex formation.** We also consider a model that combines *pre-* and *post-transcriptional* interactions. For simplicity, we assume in the

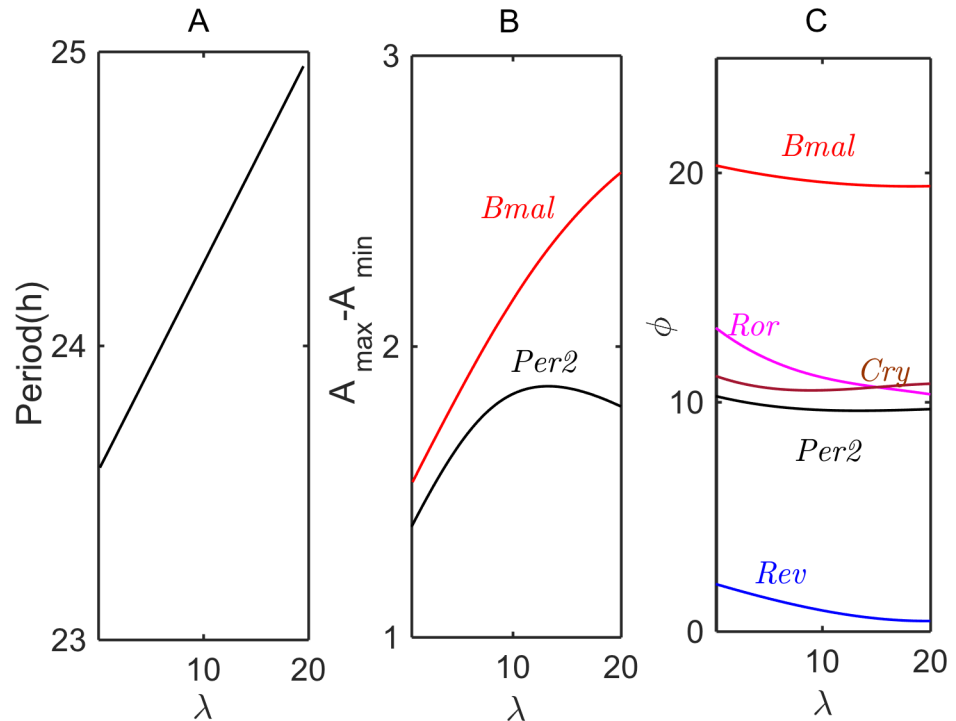

**Fig 4. Modulations of period (A), amplitude  $A_{max}-A_{min}$  (B), and phases  $\phi$  (C) of oscillation with increasing value of  $\lambda$ , the synthesis rate of *Per2AS*. In panel C, the phase of *Per2AS* is fixed at 0.**

<https://doi.org/10.1371/journal.pcbi.1005957.g004>

combined model that  $d_{dup} \gg 1$  or  $k_{diss} \ll 1$ , so that the formation of duplex sense-antisense molecules can be considered an irreversible loss of single-stranded RNAs. This case is described by the following two ODEs,

$$\begin{aligned} \frac{dPer2AS}{dt} &= \lambda_0 + \frac{\lambda_1 K_S}{K_S + Per2} - k_{assn} \cdot Per2AS \cdot Per2 - d_{AS} \cdot Per2AS, \\ \frac{dPer2}{dt} &= a \cdot V_{1max} \cdot R(\dots) \cdot \frac{\mu K_{AS}}{K_{AS} + Per2AS} - k_{assn} \cdot Per2AS \cdot Per2 - d_{per2} \cdot Per2. \end{aligned} \quad (3)$$

## Numerical methods

Numerical simulations were carried out in Mathematica, and bifurcation diagrams were calculated using AUTO [17]. In some circumstances, parameter values in the models were fitted to experimental data using the ensemble method [32] described in Suppl. S4 Text.

## Results

### Analysis and simulation of the *pre-transcriptional* model

The differential equations of the *pre-transcriptional* model (*i.e.*, Relgio’s differential equations supplemented with Eqs (1A) and (1B)) are provided in Suppl. S2 Text. The parameter values proposed by Relgio *et al.* [18] are listed in Suppl. S1 Table, where they are called ‘WT’ values. Suppl. S1 Table also lists proposed values for the parameters  $\mu$ ,  $\lambda$ ,  $K_S$  and  $K_{AS}$  that characterize the mutual interference between *Per2* and *Per2AS*.

**Simulations of Koike *et al.* observations.** Koike *et al.* [14] recently reported a large volume of RNA-seq data which show rhythmic dynamics of many genes, including known core



clock genes. These data will be very useful for building large, more comprehensive models of circadian rhythms in mammals. In this work, however, our aim is limited to explaining their observations of antiphase oscillations of *Per2* and its antisense transcript, *Per2AS*. Using the WT parameter values in Suppl. S1 Table, we find that our model does indeed provide a good fit to Koike's data (see Fig 2) and is also consistent with the observed phases of maximal expression of core-clock genes (see Fig 4C for  $\lambda = 1$ ), as catalogued in Religio *et al.* [18].

In Fig 2, we show *Per2* and *Per2AS* time-courses for three other sets of parameter values (see Suppl. S1 Table), to demonstrate the robustness of the *pre-transcriptional* model. In these simulations, we allowed all of the parameters in the model to vary, and we fitted the simulations to the observations of Koike *et al.* [14] and to the data reported in Religio *et al.* [18] for both knock-out and over-expression mutants, as well as the expression phases of the core clock genes using an ensemble method [32]; see Suppl. S4 Text. From these results, we conclude that our *pre-transcriptional* model provides a robust description of the known properties of circadian gene expression in murine cells with minimal modifications to the original Religio model.

**Bifurcation analysis.** In this subsection, we use bifurcation theory [17, 33] to gain a better understanding of the effects of *Per2* and *Per2AS* interactions in the *pre-transcriptional* version of the Religio model. Fig 3A shows a one-parameter bifurcation diagram, using  $\mu$  as the primary bifurcation parameter. All other parameters are fixed at their WT values in the original Religio *et al.* publication; see Suppl. S1 Table. (Recall that the maximum rate of *Per2* transcription is  $a \cdot V_{1\max} \cdot \mu = 12\mu$  for WT values of  $a$  and  $V_{1\max}$ .) There are four Hopf bifurcation points, HB<sub>1</sub> to HB<sub>4</sub>, in Fig 3A. The oscillations between HB<sub>3</sub> and HB<sub>4</sub> are slow (period  $\approx 50$  h), whereas the oscillations between HB<sub>1</sub> and HB<sub>2</sub> are circadian (period  $\approx 23.5$  h). The amplitude of these oscillations reaches its maximum at  $\mu \approx 1.1$ . An interesting feature of the bifurcation diagram in Fig 3A is that, at  $\mu \approx 0.12$  (see inset in Fig 3A), the amplitude of *Per2* oscillations (max–min) almost vanishes, due to multiple, competing, repressive feedbacks exerted on *Per2*.

In Fig 3B, we plot a two-parameter bifurcation diagram on the  $(\mu, \lambda)$  parameter plane. The *pre-transcriptional* model exhibits antiphase, circadian oscillations over a broad range of the rate constant,  $\lambda$ , for the synthesis of *Per2AS* RNA, despite the assumption that *Per2AS* transcription represses the production of *Per2* mRNA. Furthermore, when *Per2* and *Per2AS* oscillations are circadian and antiphase, their amplitudes are positively correlated (Fig 3C), despite their mutually repressive interactions.

Fig 4 shows how, in the *pre-transcriptional* model, the period and amplitude of *Per2* and *Bmal1* oscillations, as well as the phases of oscillation of the core-clock genes, change with increasing value of  $\lambda$ , the maximum synthesis rate of *Per2AS* (see Eq (1A)). The period of oscillation (Fig 4A) increases linearly with  $\lambda$ . The amplitude of *Per2* oscillations initially increases with increasing  $\lambda$  (Fig 4B), because the inhibition of *Per2* by *Per2AS* releases the repression of the transcriptional activator (CLOCK/BMAL1) by the PER/CRY complex. Hence, as the activity of CLOCK/BMAL1 increases, the levels of other core clock genes also increase. However, as Fig 4B shows, at sufficiently large values of  $\lambda$ , the increase of *Bmal1* level slows, and *Per2* level starts to drop. Meanwhile, the phases of maximum expression of core clock genes change only slightly with increasing  $\lambda$  (Fig 4C). The most notable phase changes are evidenced by *Ror* and *Rev*.

**Emergent oscillations.** We use two-parameter bifurcations diagrams (Fig 5) to explore the effects of *Per2AS* transcription on other elements of the core clock network, in the *pre-transcriptional* model. Fig 5A shows a two-parameter bifurcation diagram for the original Religio model in the parameter plane spanned by  $\mu$  (the maximal rate of synthesis of *Per2* mRNA) and  $y_{4_0}$  (the rate of transcription of *Ror* mRNA from an exogenous *ROR* gene, e.g., carried by a plasmid). A prediction of the Religio model is that circadian oscillations should disappear for

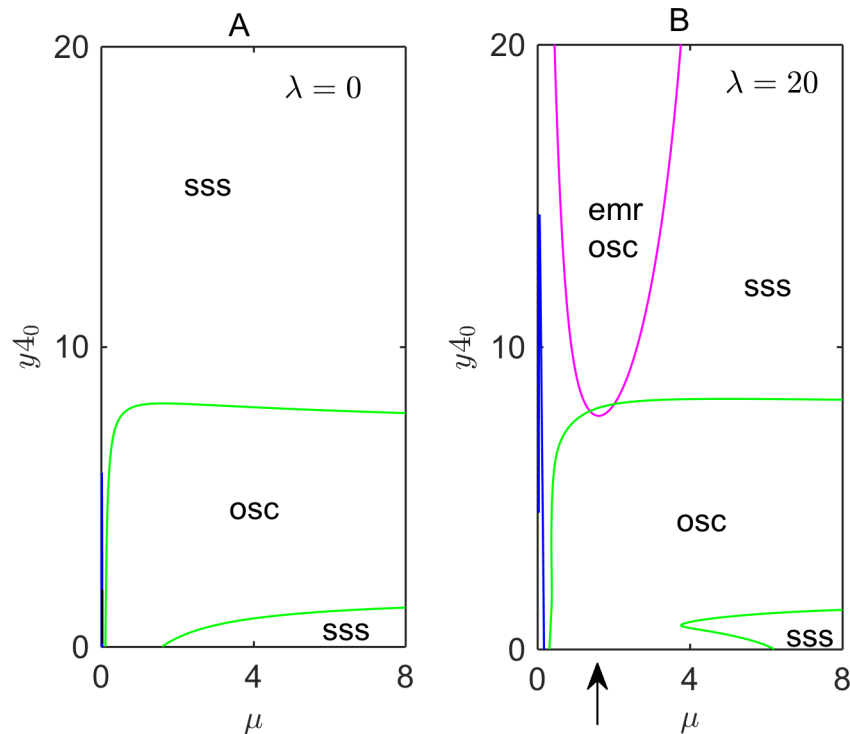

**Fig 5. Two-parameter bifurcation diagrams with exogenously overexpressed *Ror*.** The two parameters are  $\mu$  (proportional to the maximum rate of synthesis of endogenous *Per2*) and  $y_{4_0}$  (the constant rate of synthesis of *Ror* from a plasmid). (A) *Per2AS* is absent ( $\lambda = 0$ ); or (B) *Per2AS* is overexpressed ( $\lambda = 20$ ). The green and blue lines are continuations of the Hopf bifurcation points marked by  $HB_1$  and  $HB_2$  and by  $HB_3$  and  $HB_4$ , respectively, in Fig 3A. The purple line in panel B shows the domain of emergent oscillations (emr osc) at  $\lambda = 20$ . The up-arrow indicates the value of  $\mu$  chosen for the calculations in Fig 6.

<https://doi.org/10.1371/journal.pcbi.1005957.g005>

$y_{4_0}$  greater than  $\sim 8$ ; a prediction that was confirmed by constitutive overexpression of *Ror* from an exogenous copy of the gene [18]. In contrast to this prediction, we find, in the *pre-transcriptional* model, a new region of ‘emergent’ rhythmic dynamics (bounded by the purple curve in Fig 5B), attributable to the double-negative feedback loop between *Per2* and *Per2AS*, when the production rate of *Per2AS* is large enough ( $\lambda = 20$ , in Fig 5B). In contrast to exogenous overproduction of *Ror* alone, which leads to damped oscillations of *Bmal1*, our model predicts that double overproduction of *Ror* and *Per2AS* restores stable circadian oscillations.

In Fig 6 we simulate changes of the period, amplitude, and phases of oscillation with an increasing value of  $y_{4_0}$ , when other control parameters are fixed, in particular,  $\lambda = 20$  and  $\mu = 1.6$  (refer to the up-arrow in Fig 5B). The period of oscillation drops sharply at  $y_{4_0} \approx 7-8$ , where the system approaches the region marked by the upper green line in Fig 5. In the original Relgio model, at this value of  $y_{4_0}$ , the oscillatory dynamics vanishes. However, if *Per2AS* is overexpressed, the system transitions to a different oscillatory domain engendered by *Per2-Per2AS* interactions. Fig 6A shows that the period of the emergent oscillations is about 20 h. Fig 6B shows that the maximum amplitude of *Per2* oscillations changes drastically with an increase of  $y_{4_0}$ . Discontinuous jumps of the oscillation phases (Fig 6C) confirm the existence of two independent oscillatory regimes in the system.

Fig 6 shows that, in the *pre-transcriptional* model, with increasing values of the parameter  $y_{4_0}$  controlling exogenous expression of *Ror*, the system transitions from one domain of oscillations to another, if *Per2AS* is also overexpressed ( $\lambda = 20$ ). To elaborate on this effect, we show, in Suppl. S3 Fig, temporal patterns of *Per2* and *Per2AS* at three different values of  $y_{4_0}$

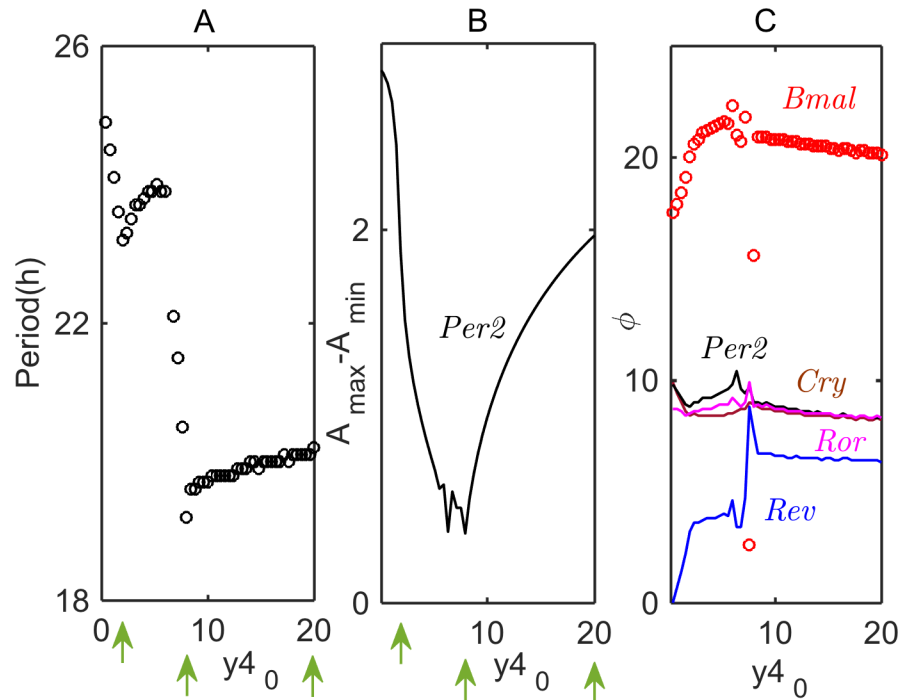

**Fig 6. Modulations of the period (A), amplitude (B), and phases (C) of oscillation with an increase of the constitutive rate of synthesis of *Ror* from a plasmid ( $y_{4_0}$ ), for a fixed rate of overexpression of endogenous *Per2AS* ( $\lambda = 20$ ).** In these simulations,  $\mu = 1.6$ . The up-arrows indicate the values of  $y_{4_0}$  for which oscillations are plotted in Suppl. S3 Fig.

<https://doi.org/10.1371/journal.pcbi.1005957.g006>

(see the up-arrows in Fig 6) over a time interval of 200 h. When  $y_{4_0}$  is small ( $y_{4_0} = 1$ ), the period of the oscillations is about 25 h, and the amplitude of *Per2* oscillations is large (Suppl. S3A and S3B Fig). Because  $\lambda$  is large, the amplitude of *Per2AS* oscillations is also large. However, at  $y_{4_0} = 8$ , the amplitude of *Per2* and *Per2AS* oscillations drop significantly, and the temporal patterns are bimodal (Suppl. S3C and S3D Fig), because near this value of  $y_{4_0}$ , the system is at the interface of two different oscillatory domains. When the system is deep inside the second domain (at  $y_{4_0} = 20$ ), the period of oscillations is  $\sim 21$  h, and the amplitudes are large again (Suppl. S3E and S3F Fig).

In Suppl. S4 Fig, we show that circadian oscillations can also be abolished by constant high level of REV-ERB in the nucleus ( $x_5(t) = x_5^0 = \text{constant}$ ), and then restored by overexpression of endogenous *Per2AS* (the parameter  $\lambda$ ). In Suppl. S5 Fig, we compare the distributions of phases of clock-gene expression in the mutant compared to a WT cell. In Suppl. S6 Fig, we show the domains of oscillations in a two-parameter bifurcation diagram, using  $x_5^0$  and  $\lambda$ , as bifurcation parameters. The open red circle in Suppl. S6 Fig shows the case of a stable steady state at  $x_5^0 = 2.4$  and  $\lambda = 0$  (Suppl. S4 Fig). As first reported in Ref. [18], when  $x_5^0$  is increased further, oscillations reappear in the Relogio model, but their period is considerably longer than 24 h. A new, emergent domain of oscillations is found only when *Per2AS* is strongly expressed. For certain values of the parameters in the model, the period of the oscillation is  $\sim 24$  h (see Suppl. S4 Fig).

### Analysis and simulation of the *post-transcriptional* model

In the *post-transcriptional* model (the Relogio model modified by Eq (2)), we assume that the physical interaction (duplex formation) between sense-antisense transcripts causes mutual

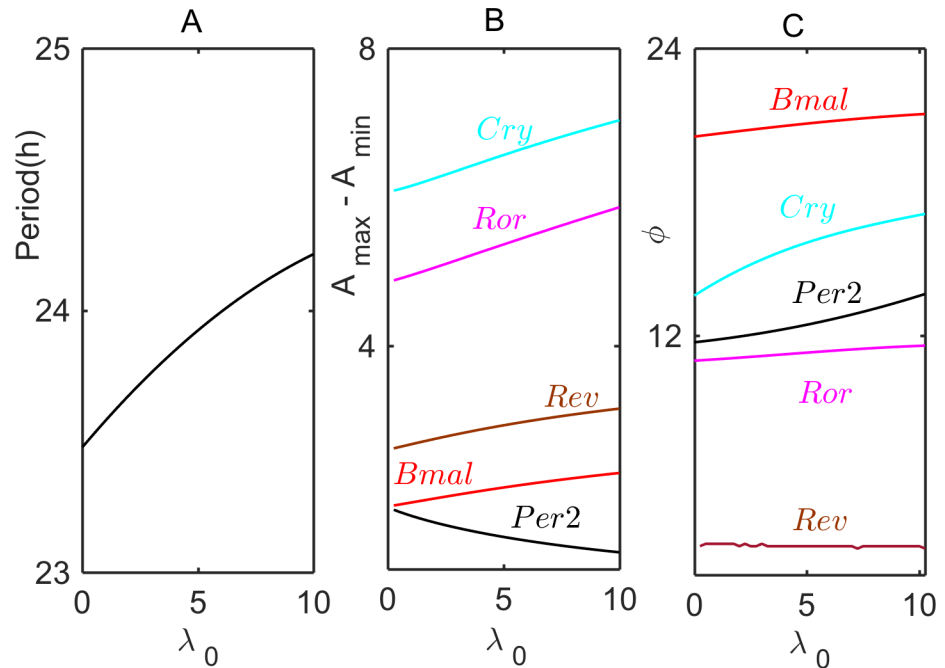

**Fig 7. Modulations of period (A), amplitudes (B), and phases (C) of oscillation of core clock genes with increasing value of the rate of exogenous synthesis of *Per2AS* in the *post-transcriptional* model.** *Per2AS* overexpression dampens the amplitude of *Per2* oscillations; consequently, because of the release of PER/CRY repression of CLOCK/BMAL1, the levels of other core clock genes increase. Parameter values are  $k_{\text{assn}} = 0.1$ ,  $k_{\text{diss}} = 0.1$ ,  $d_{\text{dup}} = 0.1$ ; other parameters in the Relgio model retain their WT values. The phase of *Per2AS* in panel C is fixed at 0.

<https://doi.org/10.1371/journal.pcbi.1005957.g007>

degradation of both RNAs. In this case, the amount of *Per2AS* in a cell is especially important, and this amount is determined by the parameter  $\lambda_0$ , which represents constitutive transcription of *Per2AS* from both the endogenous *PER2AS* sequence and from exogenous *Per2AS* sequences carried on a plasmid. In Fig 7 we show how the period, amplitudes and phases of the rhythm depend on the value of  $\lambda_0$ . In these simulations, unless otherwise specified, all parameters of the Relgio model are fixed at their WT values, and the additional parameters in Eq (2) are fixed at  $k_{\text{assn}} = 0.1$ ,  $k_{\text{diss}} = 0.1$ , and  $d_{\text{dup}} = 0.1$ .

We assume that the contribution to  $\lambda_0$  from the endogenous gene is small (say,  $0.1 < \lambda_0 < 1$ ) compared to the contribution due to plasmid copies of *Per2AS* sequences (say,  $\lambda_0 > 1$ ). At  $\lambda_0 = 0.2$  (representative of endogenous synthesis only), the period of the oscillations in the *post-transcriptional* model is ~23.5 h, the maximum level of *Per2AS* is about 5% of the maximum level of *Per2*, and *Per2* and *Per2AS* oscillate out-of-phase, i.e.  $|\phi_{\text{Per2}} - \phi_{\text{Per2AS}}| \approx 12$  h (see Suppl. S7 Fig). In other words, at these parameter values, the *post-transcriptional* model exhibits oscillations that fit reasonably well the time-courses of *Per2* and *Per2AS* oscillations observed by Koike *et al.*, shown by the black circles in Fig 2.

Fig 7 shows how the properties of circadian rhythms change in the *post-transcriptional* model with increasing rates of synthesis of exogenous *Per2AS* (parameter  $\lambda_0$ ). The period of oscillations increases modestly with increasing  $\lambda_0$  (Fig 7A). The amplitude of *Per2* oscillations drops with increasing  $\lambda_0$ , because of the duplex formation, whereas the amplitudes of oscillation of other core-clock genes increase (presumably CLOCK/BMAL1 is less strongly repressed by PER/CRY) (Fig 7B). With *Per2AS* phase set at 0 hours, we plot in Fig 7C the changes in the phases of oscillation of core clock genes. Blue and black lines in Fig 7C show that the phases of *Per2* and *Cry* mRNAs are most sensitive to the increase of *Per2AS* level.

In Suppl. S8A Fig we plot a two-parameter bifurcation diagram on the parameter plane ( $\lambda_0$ ,  $k_{\text{assn}}$ ). Although the oscillatory domain is very large in this diagram, the region where the *post-transcriptional* model oscillates with circadian properties is restricted; the black symbols mark the region where following conditions are fulfilled:

$$\begin{aligned} 23 \text{ h} < T < 25 \text{ h}, \\ (A_{\text{max}}^{\text{Per2}} - A_{\text{min}}^{\text{Per2}}) > 0.5, \\ 11 \text{ h} < |\phi_{\text{Per2}} - \phi_{\text{Per2AS}}| < 13 \text{ h}. \end{aligned} \quad (4)$$

In Suppl. S8B Fig we plot a two-parameter bifurcation diagram on the parameter plane ( $d_{\text{dup}}$ ,  $k_{\text{assn}}$ ), while fixing  $\lambda_0 = 10$  and  $k_{\text{diss}} = 0.1$ . The non-oscillatory domain in the middle of the diagram separates a region of circadian oscillations ( $22 \text{ h} < T < 25 \text{ h}$ ) at the bottom of the diagram from a region of slow oscillations ( $T > 50 \text{ h}$ ) at the top. The region of this diagram where conditions in Eq (4) are fulfilled (marked by small red symbols) is quite restricted:  $0.08 < d_{\text{dup}} < 0.27$  and  $0 < k_{\text{assn}} < 0.2$ . The blue symbols in Suppl. S8B Fig mark the region where the first and second conditions of Eq (4) are fulfilled, but the oscillations of *Per2* and *Per2AS* are not strictly antiphase, *i.e.*,  $9 \text{ h} < |\phi_{\text{Per2}} - \phi_{\text{Per2AS}}| < 15 \text{ h}$ .

In Suppl. S9 Fig, we plot the time-courses of oscillations at three locations in Suppl. S8B Fig. Suppl. S9A–S9C Fig show the case:  $k_{\text{assn}} = 1$ ,  $d_{\text{dup}} = 0.1$  for two values of  $\lambda_0$ . When  $\lambda_0 = 1$ , the dynamics of *Per2* is reminiscent of WT dynamics in the Relgio model, but when  $\lambda_0 = 10$ , the amplitude of *Per2* oscillations has become very small. For the case  $k_{\text{assn}} = 1$ ,  $d_{\text{dup}} = 0.2$  (Suppl. S9D–S9F Fig), the amplitudes of oscillations at  $\lambda_0 = 10$  are larger, but the waveform has become distinctly non-harmonic. For the case  $k_{\text{assn}} = 5$ ,  $d_{\text{dup}} = 0.2$  (Suppl. S9G–S9I Fig), the amplitudes of oscillations at  $\lambda_0 = 10$  are quite large, the waveforms are very non-harmonic, and the period ( $\sim 30 \text{ h}$ ) is non-circadian.

Our explorations of the *post-transcriptional* model show that it can be parameterized to fit the observations in Koike *et al.* [14], but the range of suitable parameter values is restricted. If any of the parameters  $d_{\text{dup}}$ ,  $k_{\text{assn}}$ , or  $k_{\text{diss}}$  in Eq (2) deviate too much from the preferred values, the oscillations may no longer fulfill the requirements in Eq (4). Especially if  $k_{\text{diss}} > k_{\text{assn}}$ , the peak amplitudes of *Per2* and *Per2AS* become quickly non-antiphase. Therefore, we conclude that the formation of *Per2/Per2AS* duplex RNA tends to destroy circadian rhythms over a wide range of values of the parameters  $d_{\text{dup}}$ ,  $k_{\text{assn}}$ , and  $k_{\text{diss}}$ .

### Analysis and simulation of a combined *pre/post-transcriptional* model

Eq (3) details how we modified the Relgio model to include both *pre-* and *post-transcriptional* interactions of *Per2* and *Per2AS*. Fig 8 shows how the period, amplitude, and phases of circadian oscillations change with increasing  $\lambda_1$  for fixed  $\lambda_0 = 0$ ,  $\mu = 1$  and  $k_{\text{assn}} = 0.1$ . The combined model is consistent with circadian, antiphase oscillations of *Per2* and *Per2AS* (see Suppl. S10 Fig). Unlike simulations of the *pre-* or *post-transcriptional* model, shown in Figs 4 and 7, the period, amplitude and phases of oscillation in the combined model are distinctly non-monotonic in dependence on  $\lambda_1$ .

On Fig 9 we continue the limit cycle oscillations of period  $T = 23.5 \text{ h}$  on the parameter plane ( $\mu$ ,  $\lambda$ ) for three different values of the rate constant for duplex formation,  $k_{\text{assn}}$ . Notice that, compared to the case  $k_{\text{assn}} = 0$  (*i.e.*, no duplex formation), the locus of 23.5-hour rhythms does not change much for  $k_{\text{assn}} = 0.05$ , but it is radically different for  $k_{\text{assn}} = 0.1$ , intersecting the line  $\mu = 1$  twice, at  $\lambda \approx 1$  and  $\lambda \approx 25$ . Therefore, as Figs 8 and 9 show, the combined *pre/post-transcriptional* model can restrict the period of oscillations within tighter bounds of  $\mu$ . The reason is that, unlike the *pre-* or *post-transcriptional* model for which *Per2-Per2AS*

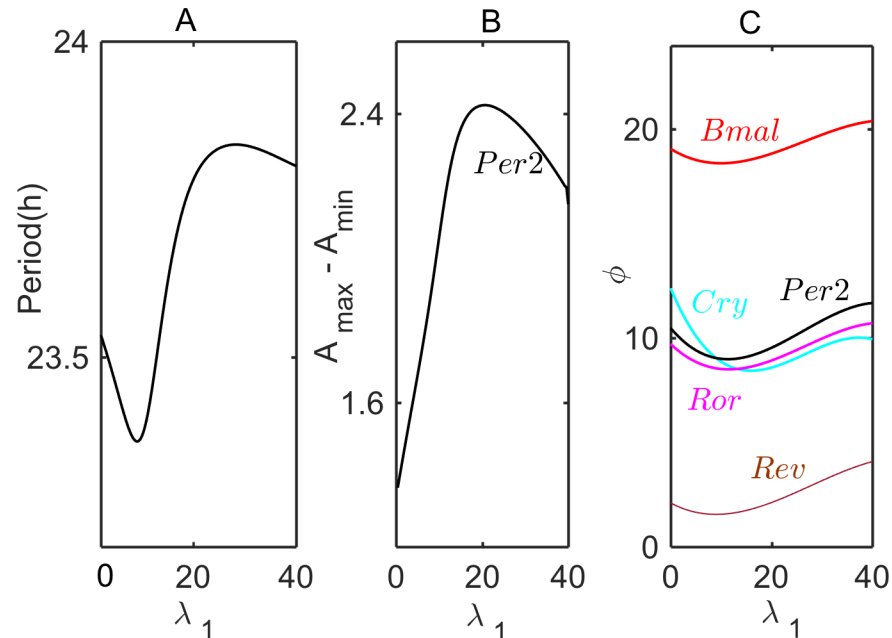

**Fig 8. Modulations of the period (A), amplitude (B), and phases (C) of oscillations in the combined *pre/post-transcriptional* model.** Parameter values are:  $\lambda_0 = 0$ ,  $k_{\text{assn}} = 0.1$ ,  $\mu = 1$ ; all others are fixed at WT values. In panel C, the phase of *Per2AS* is fixed at 0.

<https://doi.org/10.1371/journal.pcbi.1005957.g008>

interactions directly modulate only a single process of gene regulation, in the combined model two different gene-regulatory processes are simultaneously modulated. As a result, due presumably to counter-balancing effects, the period of oscillations can be restricted to a narrow interval.

## Discussion

A better understanding of the molecular mechanisms underlying mammalian circadian rhythms will undoubtedly inform our efforts to improve human health and deal with modern societal problems such as shiftwork and jetlag. However, the inventory of genes and genetic interactions in the mammalian circadian-clock network is still incomplete. Important players may be yet unknown or under-appreciated [34, 35]. For example, recent experimental data about oscillations of an antisense RNA transcript in the circadian rhythm in mouse liver [14, 36, 37] suggest a possible antagonistic relationship between a core-clock mRNA, *Per2*, and its natural antisense partner, *Per2AS*. Because antisense transcripts can be fundamental regulators of gene expression, the interactions between *Per2* and *Per2AS* may be important factors for controlling circadian rhythms [1]. To date, the molecular mechanisms of *Per2-Per2AS* interactions are unknown. In this work, we propose two realistic mechanisms for these interactions and study their effects *in silico* by incorporating *Per2-Per2AS* interactions into a well-documented mathematical model [18] of mammalian circadian rhythms. In the first hypothesis, *Per2* mRNA molecules interfere with the transcription of *Per2AS* molecules and *vice versa*. In the second hypothesis, mature *Per2* and *Per2AS* molecules form double-stranded RNA duplexes, which are rapidly degraded by RNases.

Simulations and analysis of our *pre-transcriptional* model (the first hypothesis) show that mutual transcriptional interference can generate emergent oscillations in the clock network. That is to say, *Per2-Per2AS* interactions can generate new modes of circadian oscillations not

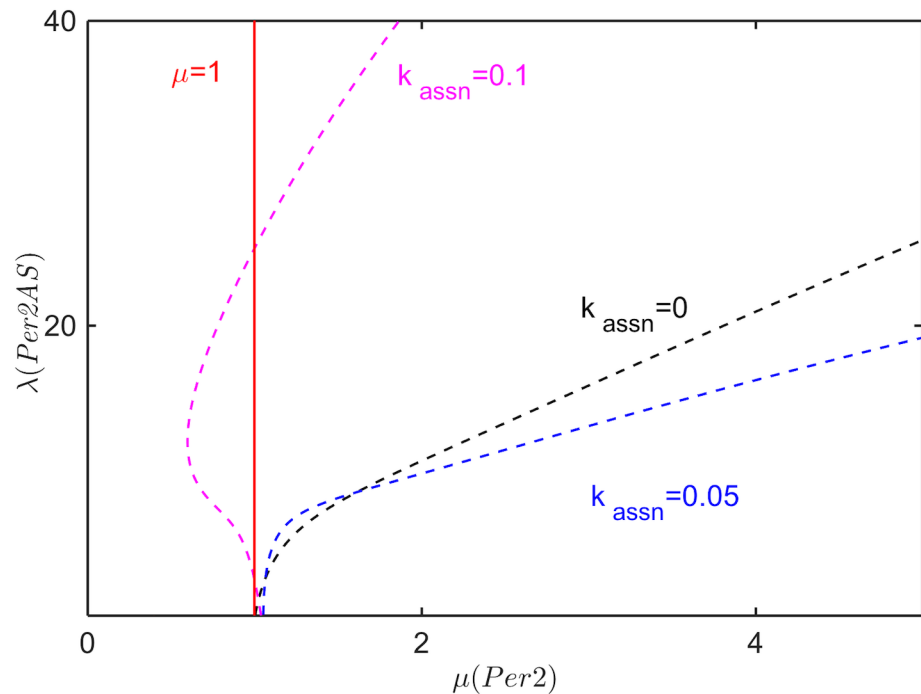

**Fig 9. Two-parameter bifurcation diagram of a combined *pre/post-transcriptional* model.** Dashed lines show the continuations of limit cycle oscillations of period  $T = 23.5$  h at three different values of the duplex-formation rate constant:  $k_{\text{assn}} = 0$  (black), 0.05 (blue) and 0.1 (purple). In these calculations,  $\lambda_0 = 0$  and other parameters are fixed at their WT values.

<https://doi.org/10.1371/journal.pcbi.1005957.g009>

seen in the original model [18]. For example (Fig 5; purple curve), our model predicts that *Per2AS* overexpression restores circadian rhythms to *ROR*-overexpressing cells by rebalancing the positive and negative interactions exerted on *BMAL1* expression by *ROR* and *REV* (Fig 1).

According to our *post-transcriptional* model (the second hypothesis), circadian oscillations are expected to be eradicated by an increasing rate of *Per2AS* expression, which is to be expected if *Per2AS* forms unstable duplex molecules with *Per2* mRNA. For both the *pre-* and *post-transcriptional* models and for a combined *pre/post-*model, we have computed how the period of oscillation and the amplitudes and phases of core clock gene oscillations will vary with the rate of synthesis of *Per2AS* transcripts (see Figs 4, 7 and 8). By altering the rate of expression of *Per2AS* transcripts, these predicted dependencies of period, amplitudes, and phases can be tested experimentally. Comparison between such experimental results and mathematical predictions can evaluate the accuracy and predictive power of the three alternative models of sense-antisense interactions. In this way, experimental interrogation, in combination with mathematical simulations, can shed light on the mechanisms of sense-antisense interactions in the mammalian circadian rhythm, and a more realistic mathematical model can be developed.

Of the three models we have studied (*pre-*, *post-*, and combined *pre/post-transcriptional* models), the *pre-transcriptional* model is the most likely, in our opinion, because it provides the most robust account of the observed, circadian, antiphasic oscillations of *Per2* and *Per2AS* RNAs [14], in the context of all the other experimental data that went into the development and parameterization of the circadian-rhythm model of Relogio *et al.* [18]. Furthermore, the *pre-transcriptional* model makes the counterintuitive prediction that *Per2AS* overexpression can restore circadian rhythms to cells that are overexpressing *ROR*. This striking prediction of

the model can be tested in a suitably designed mutant strain of mouse liver cells that overexpress both *Per2AS* RNA and *Ror* mRNA.

Our study of sense-antisense interactions has been made in the context of a specific mathematical model of mammalian circadian rhythms [18], but we suspect that our results are generic, in the sense that similar results will be found if our hypotheses are tested in different models of the circadian clock [29–31, 38]. As an example, we studied the effects of *Per2* and *Per2AS* interactions in the Mirsky *et al.* model [30] of mammalian circadian rhythms. The three main differences between the Religio and Mirsky models are that (a) Mirsky's model includes paralogs of *Per* and *Cry* (i.e., *Per1* and *Per2*, *Cry1* and *Cry2*), (b) the two models make different assumptions about how PER/CRY interferes with CLOCK/BMAL-induced gene expression, and (c) *Rev* and *Ror* play less prominent roles in the generation of rhythmic dynamics in Mirsky's model relative to Religio's model. Suppl. S11 Fig shows how period, amplitudes, and phases of oscillations change in the Mirsky *et al.* model [30] with increasing rate of *Per2AS* transcription. Notice the similarity between Fig 4 and Suppl. S11 Fig, despite the fact that Mirsky's model distinguishes between *Per1* and *Per2* transcripts and proteins. Suppl. S12A Fig shows that *Per1* oscillations are indirectly affected by the double negative feedback interactions of *Per2* and *Per2AS*, but the amplitude changes of *Per1* and *Per2* are uncorrelated. Suppl. S12B Fig shows that *Cry1* and *Cry2* oscillations also respond to *Per2AS* interference, and that their amplitudes are anti-correlated with each other. The generic effects of *Per2-Per2AS* interactions in different models are due, presumably, to generic, network-level consequences of a double-negative feedback loop embedded in the delayed negative-feedback that generates circadian rhythms.

Obviously, depending on the choice of a base model, of the mathematical representations of our hypotheses, and of parameter values, a rich repertoire of interesting dynamics are possible in a mathematical model involving many feedback loops that can generate independent oscillations [39–41]. For example, in a recent paper El-Athman *et al.* [42] have combined the Religio-2011 model of the mammalian circadian clock with a model of mammalian cell-cycle controls and shown that knocking out the tumor suppressors that bridge the two systems induces notable phase shifts in the expression of circadian clock genes. Interesting research directions in the future would be a) whether these phase shifts can be controlled by antisense transcripts of *Per2*, and b) whether the positive regulation of the tumor protein p53 by *Per2*, as reported by Gotoh *et al.* [43], can induce predictable amplitude and phase modulations in the oscillations of cell cycle elements. Finally, we hope that the modeling results reported here, suggesting that *Per2-Per2AS* interactions may have profound effects on circadian rhythmicity, may stimulate new experiments about the roles of this sense-antisense pair of RNAs in the mammalian circadian-clock network.

## Supporting information

**S1 Text. Derivation of the pre-transcriptional model (see Eqs (1A and 1B)) based on the molecular mechanism of transcriptional interference shown in Fig 1B and Suppl. S1 Fig.** (DOCX)

**S2 Text. A minimal modification of Religio *et al.* model of mammalian circadian rhythms to account for pre-transcriptional interactions between sense and antisense transcripts.** A new term in the *Per* equation and an ODE for *Per2AS* are highlighted. (DOCX)

**S3 Text. Adding new terms into Mirsky *et al.* model of mammalian circadian rhythms to account for pre-transcriptional interactions between *Per2* and *Per2AS*.** (DOCX)



**S4 Text. Applying the ensemble method of parameter estimation for fitting the modified Religio model to experimental data.**

(DOCX)

**S5 Text. Mathematica nb file for simulating of pre-transcriptional model.** The code plots antiphase dynamics of *Per2* and *Per2AS*, and calculates the period and phase difference between *Per2* and *Per2AS* oscillations.

(TXT)

**S6 Text. XPPAUT ode file for simulating the pre-transcriptional model.**

(TXT)

**S1 Fig. A wiring diagram of the molecular interactions between mature and nascent transcripts of *Per2* and *Per2AS*.**

(DOCX)

**S2 Fig. Comparisons of simulations of the ‘reduced’ (Eq (1)) and the ‘extended’ (Eqs (3–8) Suppl. S1 Text) versions of the pre-transcriptional model.**

(DOCX)

**S3 Fig. Time courses of *Per2* and *Per2AS* in simulations of exogenously overexpressed *Ror* strains.**

(DOCX)

**S4 Fig. Rescuing circadian rhythms by *Per2AS* overexpression in cells for which the oscillations were abolished by constitutive expression of REV-ERB.**

(DOCX)

**S5 Fig. Circular plots of the phase distributions of core clock genes in (A) WT cells and (B) in cells that express a high level of REV-ERB and overexpress *Per2AS*.**

(DOCX)

**S6 Fig. A diagram showing the domains of slow and emergent oscillations for the bifurcation parameters  $\lambda$  (*Per2AS* overexpression) and  $x5^0$  (constitutive REV-ERB expression).**

(DOCX)

**S7 Fig. Simulations of *Per2* and *Per2AS* rhythms in the post-transcriptional model.**

(DOCX)

**S8 Fig. Two-parameter bifurcation diagrams of the post-transcriptional model (Eq (2)).**

Chosen bifurcation parameter pairs are  $(k_{\text{assn}}, \lambda_0)$  and  $(k_{\text{assn}}, d_{\text{dup}})$ . The regions where *Per2* and *Per2AS* oscillations are circadian and antiphase (see Eq (4)) are marked in the diagrams.

(DOCX)

**S9 Fig. Time courses of *Per2*, *Per2AS*, and *Dplx* in simulations of the post-transcriptional model (see Eq (2)) at different combinations of the parameters:  $k_{\text{assn}}$ ,  $d_{\text{dup}}$ , and  $\lambda_0$ .**

(DOCX)

**S10 Fig. Time courses of *Per2* and *Per2AS* in simulations of the combined model (see Eq (3)) at different values of  $\lambda$ .**

(DOCX)

**S11 Fig. Simulations of the modified Mirsky *et al.* model of the mammalian circadian clock.** Period, amplitude, and phases of oscillations are plotted against  $\lambda$ , the rate of *Per2AS* expression.

(DOCX)

**S12 Fig. Comparisons of the dynamics of *Per1* vs *Per2*, and *Cry1* vs *Cry2* at different levels of *Per2AS* expression in simulations of the modified Mirsky *et al.* model (Suppl. S3 Text). (DOCX)**

**S1 Table. Model parameter values. (DOCX)**

## Acknowledgments

DB thanks Dr. Angela Religio for her explanations of the model and results reported in Ref. [18].

## Author Contributions

**Conceptualization:** Dorjsuren Battogtokh, Shihoko Kojima, John J. Tyson.

**Formal analysis:** Dorjsuren Battogtokh, John J. Tyson.

**Funding acquisition:** Shihoko Kojima, John J. Tyson.

**Methodology:** Dorjsuren Battogtokh.

**Project administration:** John J. Tyson.

**Visualization:** Dorjsuren Battogtokh.

**Writing – original draft:** Dorjsuren Battogtokh.

**Writing – review & editing:** Dorjsuren Battogtokh, Shihoko Kojima, John J. Tyson.

## References

1. Pelechano V, Steinmetz LM. Gene regulation by antisense transcription. *Nature reviews Genetics*. 2013; 14(12):880–93. <https://doi.org/10.1038/nrg3594> PMID: 24217315
2. Werner A. Biological functions of natural antisense transcripts. *BMC Biology*. 2013; 11(1):31. <https://doi.org/10.1186/1741-7007-11-31> PMID: 23577602
3. Papenfort K, Vogel J. Multiple target regulation by small noncoding RNAs rewires gene expression at the post-transcriptional level. *Res Microbiol*. 2009; 160(4):278–87. <https://doi.org/10.1016/j.resmic.2009.03.004> PMID: 19366629.
4. Waters LS, Storz G. Regulatory RNAs in bacteria. *Cell*. 2009; 136(4):615–28. Epub 2009/02/26. <https://doi.org/10.1016/j.cell.2009.01.043> PMID: 19239884; PubMed Central PMCID: PMC3132550.
5. Georg J, Hess WR. cis-antisense RNA, another level of gene regulation in bacteria. *Microbiology and molecular biology reviews: MMBR*. 2011; 75(2):286–300. Epub 2011/06/08. <https://doi.org/10.1128/MMBR.00032-10> PMID: 21646430; PubMed Central PMCID: PMC3122628.
6. Shimoni Y, Friedlander G, Hetzroni G, Niv G, Altuvia S, Biham O, et al. Regulation of gene expression by small non-coding RNAs: a quantitative view. *Molecular systems biology*. 2007; 3:138. <https://doi.org/10.1038/msb4100181> PMC2013925. PMID: 17893699
7. Arraiano CM, Andrade JM, Domingues S, Guinote IB, Malecki M, Matos RG, et al. The critical role of RNA processing and degradation in the control of gene expression. *FEMS microbiology reviews*. 2010; 34(5):883–923. Epub 2010/07/28. <https://doi.org/10.1111/j.1574-6976.2010.00242.x> PMID: 20659169.
8. Duhring U, Axmann IM, Hess WR, Wilde A. An internal antisense RNA regulates expression of the photosynthesis gene *isiA*. *Proc Natl Acad Sci U S A*. 2006; 103(18):7054–8. Epub 2006/04/26. <https://doi.org/10.1073/pnas.0600927103> PMID: 16636284; PubMed Central PMCID: PMC31459017.
9. Kawano M, Aravind L, Storz G. An antisense RNA controls synthesis of an SOS-induced toxin evolved from an antitoxin. *Molecular microbiology*. 2007; 64(3):738–54. Epub 2007/04/28. <https://doi.org/10.1111/j.1365-2958.2007.05688.x> PMID: 17462020; PubMed Central PMCID: PMC31891008.
10. Johnson CM, Manias DA, Haemig HAH, Shokeen S, Weaver KE, Henkin TM, et al. Direct Evidence for Control of the Pheromone-Inducible *prgQ* Operon of *Enterococcus faecalis* Plasmid pCF10 by a

- Countertranscript-Driven Attenuation Mechanism. *Journal of Bacteriology*. 2010; 192(6):1634–42. <https://doi.org/10.1128/JB.01525-09> PMID: 20097859
11. Stork M, Di Lorenzo M, Welch TJ, Crosa JH. Transcription termination within the iron transport-biosynthesis operon of *Vibrio anguillarum* requires an antisense RNA. *J Bacteriol*. 2007; 189(9):3479–88. Epub 2007/03/06. <https://doi.org/10.1128/JB.00619-06> PMID: 17337574; PubMed Central PMCID: PMCPMC1855896.
  12. Giangrossi M, Prosseda G, Tran CN, Brandi A, Colonna B, Falconi M. A novel antisense RNA regulates at transcriptional level the virulence gene *icsA* of *Shigella flexneri*. *Nucleic Acids Res*. 2010; 38(10):3362–75. Epub 2010/02/05. <https://doi.org/10.1093/nar/gkq025> PMID: 20129941; PubMed Central PMCID: PMCPMC2879508.
  13. Bordoy AE, Chatterjee A. Cis-Antisense Transcription Gives Rise to Tunable Genetic Switch Behavior: A Mathematical Modeling Approach. *PLoS one*. 2015; 10(7):e0133873. <https://doi.org/10.1371/journal.pone.0133873> PMC4519249. PMID: 26222133
  14. Koike N, Yoo S-H, Huang H-C, Kumar V, Lee C, Kim T-K, et al. Transcriptional Architecture and Chromatin Landscape of the Core Circadian Clock in Mammals. *Science (New York, NY)*. 2012; 338(6105):349–54. <https://doi.org/10.1126/science.1226339> PMC3694775. PMID: 22936566
  15. Chatterjee A, Cook LCC, Shu C-C, Chen Y, Manias DA, Ramkrishna D, et al. Antagonistic self-sensing and mate-sensing signaling controls antibiotic-resistance transfer. *Proceedings of the National Academy of Sciences of the United States of America*. 2013; 110(17):7086–90. <https://doi.org/10.1073/pnas.1212256110> PMC3637703. PMID: 23569272
  16. Xu Z, Wei W, Gagneur J, Clauder-Münster S, Smolik M, Huber W, et al. Antisense expression increases gene expression variability and locus interdependency. *Molecular systems biology*. 2011; 7:468–. <https://doi.org/10.1038/msb.2011.1> PMC3063692. PMID: 21326235
  17. Doedel E, Champneys A, Dercole F, Fairgrieve T, Kuznetsov Y, Oldeman B, et al. Auto: {S}oftware for continuation and bifurcation problems in ordinary differential equations. 2009.
  18. Relógio A, Westermark PO, Wallach T, Schellenberg K, Kramer A, Herzl H. Tuning the Mammalian Circadian Clock: Robust Synergy of Two Loops. *PLOS Computational Biology*. 2011; 7(12):e1002309. <https://doi.org/10.1371/journal.pcbi.1002309> PMID: 22194677
  19. Kornmann B, Schaad O, Bujard H, Takahashi JS, Schibler U. System-Driven and Oscillator-Dependent Circadian Transcription in Mice with a Conditionally Active Liver Clock. *PLOS Biology*. 2007; 5(2):e34. <https://doi.org/10.1371/journal.pbio.0050034> PMID: 17298173
  20. Vanselow K, Vanselow JT, Westermark PO, Reischl S, Maier B, Korte T, et al. Differential effects of PER2 phosphorylation: molecular basis for the human familial advanced sleep phase syndrome (FASPS). *Genes & Development*. 2006; 20(19):2660–72. <https://doi.org/10.1101/gad.397006> PMC1578693. PMID: 16983144
  21. Relogio A, Thomas P, Medina-Perez P, Reischl S, Bervoets S, Gloc E, et al. Ras-mediated deregulation of the circadian clock in cancer. *PLoS genetics*. 2014; 10(5):e1004338. Epub 2014/05/31. <https://doi.org/10.1371/journal.pgen.1004338> PMID: 24875049; PubMed Central PMCID: PMCPMC4038477.
  22. Xue Z, Ye Q, Anson SR, Yang J, Xiao G, Kowbel D, et al. Transcriptional interference by antisense RNA is required for circadian clock function. *Nature*. 2014; 514(7524):650–3. Epub 2014/08/19. <https://doi.org/10.1038/nature13671> PMID: 25132551; PubMed Central PMCID: PMCPMC4214883.
  23. Ui-Tei K. Is the Efficiency of RNA Silencing Evolutionarily Regulated? *International journal of molecular sciences*. 2016; 17(5). Epub 2016/05/18. <https://doi.org/10.3390/ijms17050719> PMID: 27187367; PubMed Central PMCID: PMCPMC4881541.
  24. Hsieh H, Boehm J, Sato C, Iwatsubo T, Tomita T, Sisodia S, et al. AMPAR Removal Underlies A $\beta$ -Induced Synaptic Depression and Dendritic Spine Loss. *Neuron*. 52(5):831–43. <https://doi.org/10.1016/j.neuron.2006.10.035> PMID: 17145504
  25. Yan J, Shi G, Zhang Z, Wu X, Liu Z, Xing L, et al. An intensity ratio of interlocking loops determines circadian period length. *Nucleic Acids Research*. 2014; 42(16):10278–87. <https://doi.org/10.1093/nar/gku701> PMID: 25122753
  26. Saithong T, Painter KJ, Millar AJ. The Contributions of Interlocking Loops and Extensive Nonlinearity to the Properties of Circadian Clock Models. *PLoS one*. 2010; 5(11):e13867. <https://doi.org/10.1371/journal.pone.0013867> PMID: 21152419
  27. Cho H, Zhao X, Hatori M, Yu RT, Barish GD, Lam MT, et al. Regulation of circadian behaviour and metabolism by REV-ERB-alpha and REV-ERB-beta. *Nature*. 2012; 485(7396):123–7. Epub 2012/03/31. <https://doi.org/10.1038/nature11048> PMID: 22460952; PubMed Central PMCID: PMCPMC3367514.
  28. Reppert SM, Weaver DR. Coordination of circadian timing in mammals. *Nature*. 2002; 418(6901):935–41. Epub 2002/08/29. <https://doi.org/10.1038/nature00965> PMID: 12198538.

29. Kim JK, Forger DB. A mechanism for robust circadian timekeeping via stoichiometric balance. *Molecular systems biology*. 2012; 8:630. Epub 2012/12/06. <https://doi.org/10.1038/msb.2012.62> PMID: [23212247](https://pubmed.ncbi.nlm.nih.gov/23212247/); PubMed Central PMCID: PMC3542529.
30. Mirsky HP, Liu AC, Welsh DK, Kay SA, Doyle FJ. A model of the cell-autonomous mammalian circadian clock. *Proceedings of the National Academy of Sciences*. 2009; 106(27):11107–12. <https://doi.org/10.1073/pnas.0904837106> PMID: [19549830](https://pubmed.ncbi.nlm.nih.gov/19549830/)
31. Leloup J-C, Goldbeter A. Toward a detailed computational model for the mammalian circadian clock. *Proceedings of the National Academy of Sciences of the United States of America*. 2003; 100(12):7051–6. <https://doi.org/10.1073/pnas.1132112100> PMC165828. PMID: [12775757](https://pubmed.ncbi.nlm.nih.gov/12775757/)
32. Battogtokh D, Asch DK, Case ME, Arnold J, Schuttler HB. An ensemble method for identifying regulatory circuits with special reference to the qa gene cluster of *Neurospora crassa*. *Proc Natl Acad Sci U S A*. 2002; 99(26):16904–9. Epub 2002/12/13. <https://doi.org/10.1073/pnas.262658899> PMID: [12477937](https://pubmed.ncbi.nlm.nih.gov/12477937/); PubMed Central PMCID: PMC3139242.
33. Battogtokh D, Tyson JJ. Bifurcation analysis of a model of the budding yeast cell cycle. *Chaos (Woodbury, NY)*. 2004; 14(3):653–61. Epub 2004/09/28. <https://doi.org/10.1063/1.1780011> PMID: [15446975](https://pubmed.ncbi.nlm.nih.gov/15446975/).
34. Bhargava A, Herzog H, Ananthasubramanian B. Mining for novel candidate clock genes in the circadian regulatory network. *BMC Systems Biology*. 2015; 9(1):78. <https://doi.org/10.1186/s12918-015-0227-2> PMID: [26576534](https://pubmed.ncbi.nlm.nih.gov/26576534/)
35. Anafi RC, Lee Y, Sato TK, Venkataraman A, Ramanathan C, Kavakli IH, et al. Machine Learning Helps Identify CHRONO as a Circadian Clock Component. *PLoS Biology*. 2014; 12(4):e1001840. <https://doi.org/10.1371/journal.pbio.1001840> PMC3988006. PMID: [24737000](https://pubmed.ncbi.nlm.nih.gov/24737000/)
36. Menet JS, Rodriguez J, Abruzzi KC, Rosbash M. Nascent-Seq reveals novel features of mouse circadian transcriptional regulation. *eLife*. 2012; 1:e00011. <https://doi.org/10.7554/eLife.00011> PMC3492862. PMID: [23150795](https://pubmed.ncbi.nlm.nih.gov/23150795/)
37. Vollmers C, Schmitz RJ, Nathanson J, Yeo G, Ecker JR, Panda S. Circadian oscillations of protein-coding and regulatory RNAs in a highly dynamic mammalian liver epigenome. *Cell metabolism*. 2012; 16(6):833–45. <https://doi.org/10.1016/j.cmet.2012.11.004> PMC3541940. PMID: [23217262](https://pubmed.ncbi.nlm.nih.gov/23217262/)
38. Pett JP, Korenčič A, Wesener F, Kramer A, Herzog H. Feedback Loops of the Mammalian Circadian Clock Constitute Repressilator. *PLoS Computational Biology*. 2016; 12(12):e1005266. <https://doi.org/10.1371/journal.pcbi.1005266> PMC5189953. PMID: [27942033](https://pubmed.ncbi.nlm.nih.gov/27942033/)
39. Gérard C, Goldbeter A. Temporal self-organization of the cyclin/Cdk network driving the mammalian cell cycle. *Proceedings of the National Academy of Sciences of the United States of America*. 2009; 106(51):21643–8. <https://doi.org/10.1073/pnas.0903827106> PMC2799800. PMID: [20007375](https://pubmed.ncbi.nlm.nih.gov/20007375/)
40. Gerard C, Goldbeter A. Entrainment of the mammalian cell cycle by the circadian clock: modeling two coupled cellular rhythms. *PLoS Comput Biol*. 2012; 8(5):e1002516. Epub 2012/06/14. <https://doi.org/10.1371/journal.pcbi.1002516> PMID: [22693436](https://pubmed.ncbi.nlm.nih.gov/22693436/); PubMed Central PMCID: PMC3364934.
41. Tsai TY, Choi YS, Ma W, Pomerening JR, Tang C, Ferrell JE Jr. Robust, tunable biological oscillations from interlinked positive and negative feedback loops. *Science*. 2008; 321(5885):126–9. Epub 2008/07/05. <https://doi.org/10.1126/science.1156951> PMID: [18599789](https://pubmed.ncbi.nlm.nih.gov/18599789/); PubMed Central PMCID: PMC312728800.
42. El-Athman R, Genov NN, Mazuch J, Zhang K, Yu Y, Fuhr L, et al. The Ink4a/Arf locus operates as a regulator of the circadian clock modulating RAS activity. *PLOS Biology*. 2017; 15(12):e2002940. <https://doi.org/10.1371/journal.pbio.2002940> PMID: [29216180](https://pubmed.ncbi.nlm.nih.gov/29216180/)
43. Gotoh T, Kim JK, Liu J, Vila-Caballer M, Stauffer PE, Tyson JJ, et al. Model-driven experimental approach reveals the complex regulatory distribution of p53 by the circadian factor Period 2. *Proceedings of the National Academy of Sciences*. 2016; 113(47):13516–21. <https://doi.org/10.1073/pnas.1607984113> PMID: [27834218](https://pubmed.ncbi.nlm.nih.gov/27834218/)
